# Supplementary material for: The Effect of Smoking on Progression from Ductal Carcinoma in Situ to Invasive Ductal Carcinoma: A Retrospective Study
Source: Research Square preprint supplement (doi:10.21203/rs.3.rs-37789/v4), 2021-08-30
Supplement: Supplementary file 1 [file 3cd9973a46dda1abd764283d.docx]

**Additional file2; Table S2.** **Correlation between smoking status and clinicopathological features**

| Parameters | **Smoking status** | | ***p* value** | **Smoking status** | | ***p* value** |
| --- | --- | --- | --- | --- | --- | --- |
| **Not current smokers**  **(*n* = 120)** | **Current smokers**  **(*n* = 8)** | **Former smokers**  **(*n* = 13)** | **Current smokers**  **(*n* = 8)** |
| Age at operation (years old)  ≤ 40  > 40 | 12 (10.0 %)  108 (90.0 %) | 5 (62.5 %)  3 (37.5 %) | <0.001 | 4 (30.8 %)  9 (69.2 %) | 5 (62.5 %)  3 (37.5 %) | 0.154 |
| Symptoms  Asymptomatic  Symptomatic | 45 (37.5 %)  75 (62.5 %) | 0 (0.0 %)  8 (100.0 %) | 0.031 | 4 (30.8 %)  9 (69.2 %) | 0 (0.0 %)  8 (100.0 %) | 0.081 |
| Palpability  Impalpabe  Palpable | 35 (29.2 %)  85 (70.8 %) | 0 (0.0 %)  8 (100.0 %) | 0.073 | 3 (23.1 %)  10 (76.9 %) | 0 (0.0 %)  8 (100.0 %) | 0.142 |
| Tumor size (mm)  ≤ 20.0  > 20.0 | 35 (29.2 %)  85 (70.8 %) | 3 (37.5 %)  5 (62.5 %) | 0.617 | 8 (61.5 %)  5 (38.5 %) | 3 (37.5 %)  5 (62.5 %) | 0.284 |
| Biopsy device  Core needle biopsy  Vacuum-assisted biopsy | 71 (59.2 %)  49 (40.8 %) | 2 (25.0 %)  6 (75.0 %) | 0.059 | 8 (61.5 %)  5 (38.5 %) | 2 (25.0 %)  6 (75.0 %) | 0.104 |
| Estrogen receptor  Negative  Positive | 23 (19.2 %)  97 (80.8 %) | 1 (12.5 %)  7 (87.5 %) | 0.640 | 4 (30.8 %)  9 (69.2 %) | 1 (12.5 %)  7 (87.5 %) | 0.340 |
| Progesterone receptor  Negative  Positive | 39 (32.5 %)  81 (67.5 %) | 2 (25.0 %)  6 (75.0 %) | 0.660 | 4 (30.8 %)  9 (69.2 %) | 2 (25.0 %)  6 (75.0 %) | 0.776 |
| HER2  ≤2  3 | 101 (84.2 %)  19 (15.8 %) | 8 (100.0 %)  0 (0.0 %) | 0.223 | 10 (76.9 %)  3 (23.1 %) | 8 (100.0 %)  0 (0.0 %) | 0.142 |
| Ki67  ≤14 %  >14 % | 96 (80.0 %)  24 (20.0 %) | 5 (62.5 %)  3 (37.5 %) | 0.240 | 10 (76.9 %)  3 (23.1 %) | 5 (62.5 %)  3 (37.5 %) | 0.477 |
| Grade of DCIS  Low, intermediate  High | 96 (80.0 %)  24 (20.0 %) | 7 (87.5 %)  1 (12.5 %) | 0.604 | 11 (84.6 %)  2 (15.4 %) | 7 (87.5 %)  1 (12.5 %) | 0.854 |
| Comedonecrosis  Absence  Presence | 56 (46.7 %)  64 (53.3 %) | 4 (50.0 %)  4 (50.0 %) | 0.855 | 7 (53.8 %)  6 (46.2 %) | 4 (50.0 %)  4 (50.0 %) | 0.864 |
| Intraductal calcification  Absence  Presence | 100 (83.3 %)  20 (16.7 %) | 7 (87.5 %)  1 (12.5 %) | 0.758 | 11 (84.6 %)  2 (15.4 %) | 7 (87.5 %)  1 (12.5 %) | 0.854 |
| Lymphoid infiltrate  Negative, mild  Moderate, severe | 82 (68.3 %)  38 (31.7 %) | 7 (87.5 %)  1 (12.5 %) | 0.254 | 9 (69.2 %)  4 (30.8 %) | 7 (87.5 %)  1 (12.5 %) | 0.340 |
| Numbers of cigarettes (per day)  ≤10  10< | 125 (95.8 %)  5 (4.2 %) | 1 (12.5 %)  7 (87.5 %) | <0.001 | 8 (61.5 %)  5 (38.5 %) | 1 (12.5 %)  7 (87.5 %) | 0.027 |
| Years of smoking (years)  ≤10  10< | 112 (93.3 %)  8 (6.7 %) | 2 (25.0 %)  6 (75.0 %) | <0.001 | 5 (38.5 %)  8 (61.5 %) | 2 (25.0 %)  6 (75.0 %) | 0.525 |
| Pack-years of smoking  ≤10  10< | 115 (95.8 %)  5 (4.2 %) | 3 (37.5 %)  5 (62.5 %) | <0.001 | 8 (61.5 %)  5 (38.5 %) | 3 (37.5 %)  5 (62.5 %) | 0.284 |
| Postoperative pathology  DCIS only  Invasive ductal carcinoma | 70 (58.3 %)  50 (41.7 %) | 8 (100.0 %)  0 (0.0 %) | 0.019 | 7 (53.8 %)  6 (46.2 %) | 8 (100.0 %)  0 (0.0 %) | 0.023 |

DCIS: ductal carcinoma in situ, HER2: human epidermal growth factor receptor 2
